# Supplementary material
Source: PubMed Central journal article supplement (PMC240680)

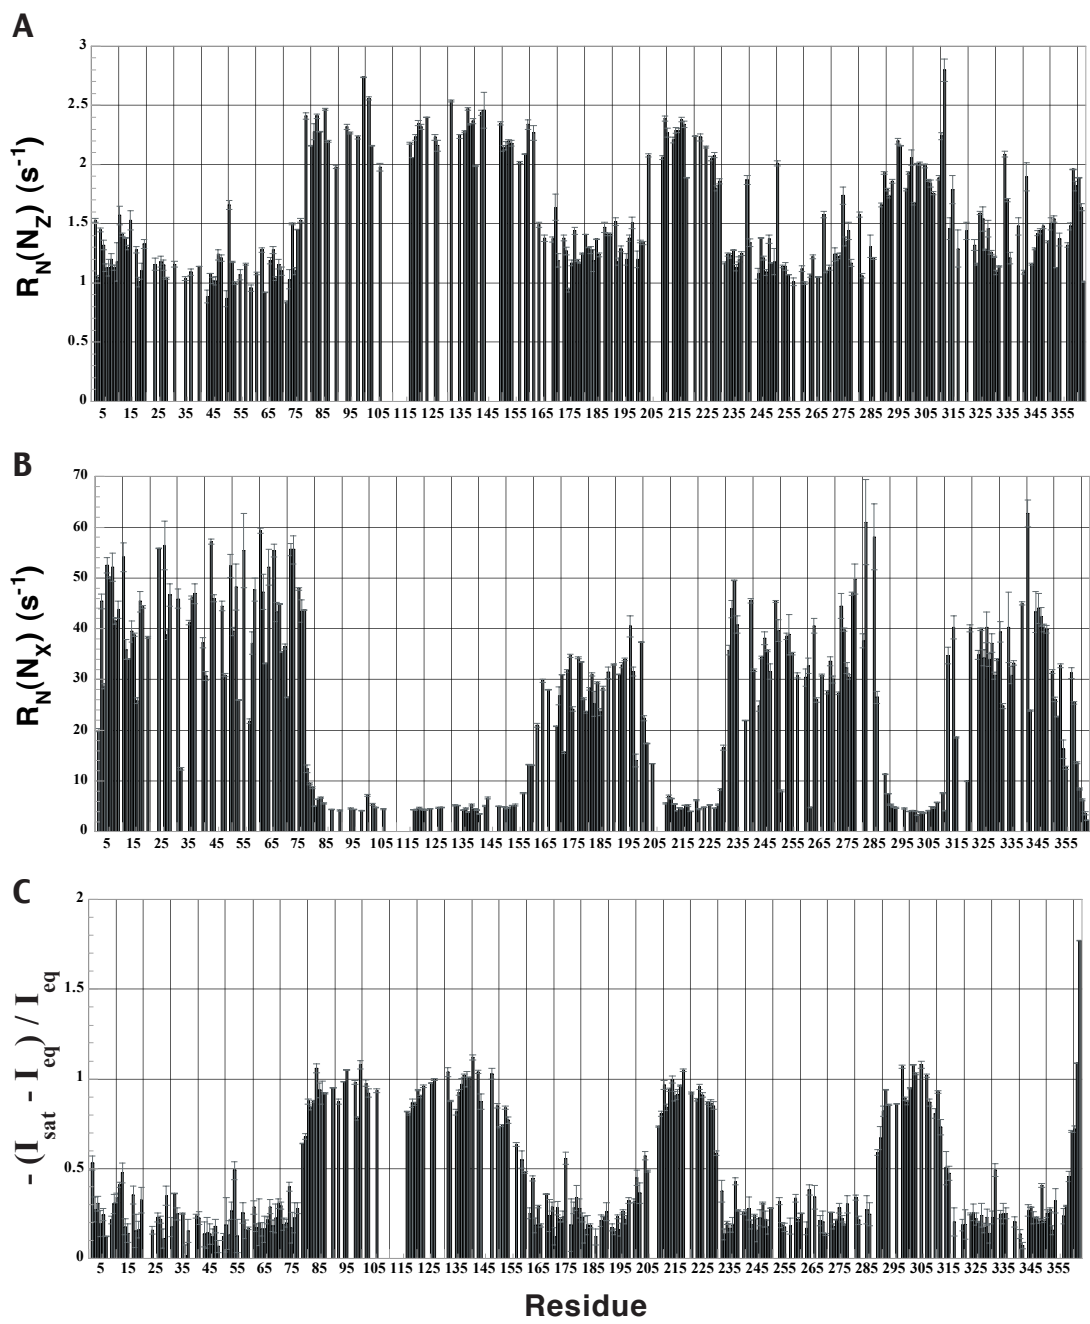

Supplement: pnas_100_22_12694__3.pdf [file pnas_100_22_12694__3.pdf]
